# Supplementary material for: MiRNA-Related Genetic Variations Associated with Radiotherapy-Induced Toxicities in Patients with Locally Advanced Non–Small Cell Lung Cancer
Source: PLoS One. 2016 Mar 18;11(3):e0150467. doi: 10.1371/journal.pone.0150467 (PMC4798772; doi:10.1371/journal.pone.0150467)
Supplement: S2 Table — (XLSX) [file pone.0150467.s003.xlsx]

## Sheet: 01102014_CI_LCradtox_dis_miRNA_
Supplementary Table 2. Logistic regression analysis of 233 miRNA-related SNPs and risk of pneumonitis in locally-advanced lung cancer patients
SNP	Gene	Site	Chr	Position	Total	wt/wt	wt/var	var/var	Pneu>=2	Pneu<2	MOI	OR	L95	U95	Pvalue
rs720014	DGCR8	processing	22	18478882	167	94	56	7	25\33\2	69\23\5	dom	3.54072	1.64692	7.61221	0.001206
rs3757	DGCR8	processing	22	18479331	167	94	56	7	25\33\2	69\23\5	dom	3.54072	1.64692	7.61221	0.001206
rs1633445	DGCR8	processing	22	18480596	167	94	56	7	25\33\2	69\23\5	dom	3.54072	1.64692	7.61221	0.001206
rs7957	TNFRSF10D	binding	8	23049312	167	85	63	9	28\26\6	57\37\3	add	2.43949	1.25316	4.74888	0.0086914
rs3087833	GEMIN4	processing	17	604480	167	76	67	14	22\29\9	54\38\5	add	2.2157	1.2057	4.07177	0.0103929
rs724710	BCL2L11	binding	2	111624162	167	72	69	16	19\35\6	53\34\10	dom	2.5957	1.20877	5.574	0.0144369
rs573010	RNASEN	processing	5	31480191	167	81	65	11	25\31\4	56\34\7	dom	2.43208	1.13755	5.1998	0.0218843
rs2248718	ATP6V1C1	binding	8	104151483	167	106	40	11	34\22\4	72\18\7	dom	2.41792	1.09185	5.35451	0.0295108
rs4037	ALDH18A1	binding	10	97355810	167	60	76	21	21\35\4	39\41\17	rec	0.252255	0.0696999	0.91295	0.0358396
rs7669660	ADH5	binding	4	100211625	167	125	30	2	51\9\0	74\21\2	dom	0.370298	0.142803	0.960208	0.0410043
rs16950113	SMAD7	binding	18	44700587	167	136	20	1	48\11\1	88\9\0	dom	2.96095	1.01327	8.65236	0.0472482
rs1106841	XPO5	processing	6	43604640	167	63	78	16	29\25\6	34\53\10	dom	0.478843	0.22804	1.00549	0.0517145
rs3805525	RNASEN	processing	5	31437710	167	47	80	30	14\34\12	33\46\18	dom	2.29812	0.99138	5.32726	0.0524061
rs2276635	ATG9A	binding	2	219795685	167	137	19	1	55\5\0	82\14\1	dom	0.293455	0.0834469	1.03199	0.0560187
rs4645900	BAX	binding	19	54156175	167	143	14	0	51\9\0	92\5\0	dom	3.26242	0.959416	11.0936	0.0582759
rs2740351	GEMIN4	processing	17	590176	167	42	82	33	13\28\19	29\54\14	rec	2.32428	0.968992	5.57513	0.0588382
rs7813	GEMIN4	processing	17	594936	167	42	82	33	13\28\19	29\54\14	rec	2.32428	0.968992	5.57513	0.0588382
rs2969	IGF2BP1	binding	17	44483246	167	91	53	13	39\19\2	52\34\11	rec	0.196214	0.0360417	1.0682	0.059612
rs3792830	RNASEN	processing	5	31452005	167	146	10	1	54\6\0	92\4\1	dom	4.33787	0.926157	20.3174	0.0625198
rs7499	COL18A1	binding	21	45756756	167	60	73	24	24\30\6	36\43\18	rec	0.370184	0.128089	1.06986	0.0664667
rs8713	CAV1	binding	7	115987033	167	106	47	4	45\15\0	61\32\4	dom	0.468365	0.205894	1.06543	0.0704788
rs16901165	RNASEN	processing	5	31475616	167	138	18	1	50\10\0	88\8\1	dom	2.70719	0.907333	8.0774	0.0741628
rs1884056	BCL2L2	binding	14	22836431	167	82	62	13	35\22\3	47\40\10	add	0.575097	0.304942	1.08459	0.087433
rs11089328	DGCR8	processing	22	18459603	167	55	75	27	25\27\8	30\48\19	dom	0.519249	0.243646	1.1066	0.0895858
rs1047312	SULT1C1	binding	2	108292212	167	64	26	67	21\8\31	43\18\36	rec	1.88437	0.895114	3.96694	0.0952716
rs7719666	RNASEN	processing	5	31556535	167	39	76	42	19\24\17	20\52\25	dom	0.504569	0.222883	1.14226	0.100818
rs7051161	RPS6KA3	binding	X	20080829	167	122	20	15	48\9\3	74\11\12	rec	0.293461	0.0669559	1.28621	0.103925
rs2234978	FAS	binding	10	90761809	167	75	65	17	32\18\10	43\47\7	rec	2.55564	0.823108	7.93489	0.104546
rs1042489	BIRC5	binding	17	73731801	167	57	78	22	22\32\6	35\46\16	rec	0.392907	0.126133	1.22392	0.107087
rs2257082	XPO5	processing	6	43600556	167	73	74	10	24\31\5	49\43\5	dom	1.84426	0.873227	3.89507	0.108585
rs15864	GSTM3	binding	1	110094379	162	79	55	18	32\17\10	47\38\8	rec	2.63306	0.804099	8.62208	0.109665
rs11594179	SUFU	binding	10	104382570	167	101	46	10	36\20\4	65\26\6	dom	1.87263	0.854791	4.10246	0.116917
rs3095825	RNASEN	processing	5	31476146	167	93	61	3	31\29\0	62\32\3	dom	1.84692	0.857119	3.97974	0.117269
rs1640299	DGCR8	processing	22	18478359	167	42	77	38	11\34\15	31\43\23	dom	1.96268	0.831222	4.63428	0.123985
rs11061209	RAN	processing	12	129930941	167	68	72	17	24\27\9	44\45\8	rec	2.51905	0.753681	8.41948	0.133449
rs4252745	MDM4	binding	1	202785810	167	41	79	37	12\36\12	29\43\25	dom	1.89028	0.817634	4.37013	0.136462
rs5973822	ATG4A	binding	X	107283614	167	150	5	2	56\2\2	94\3\0	dom	3.71854	0.650721	21.2496	0.139727
rs197412	DDX20	processing	1	112110476	167	60	80	17	22\34\4	38\46\13	rec	0.381792	0.106127	1.3735	0.140455
rs2227301	XPO5	processing	6	43593261	167	98	55	4	42\18\0	56\37\4	dom	0.563494	0.262617	1.20908	0.140874
rs6854081	FGF2	binding	4	124036157	167	122	33	2	50\9\1	72\24\1	dom	0.507476	0.204868	1.25706	0.142746
rs281437	ICAM1	binding	19	10258238	167	88	60	9	31\25\4	57\35\5	dom	1.73925	0.824714	3.66794	0.146015
rs9920	CAV1	binding	7	115987328	167	124	31	2	51\9\0	73\22\2	dom	0.488153	0.184941	1.28848	0.14758
rs713065	FZD4	binding	11	86335168	167	43	91	23	18\36\6	25\55\17	rec	0.455539	0.15614	1.32904	0.150074
rs3025039	VEGF	binding	6	43860514	167	110	44	3	38\19\3	72\25\0	dom	1.78918	0.806532	3.96906	0.152413
rs3025040	VEGF	binding	6	43861029	167	110	44	3	38\19\3	72\25\0	dom	1.78918	0.806532	3.96906	0.152413
rs7330	CDKN1B	binding	12	12766184	167	54	75	28	24\26\10	30\49\18	dom	0.563399	0.25667	1.23668	0.152607
rs542912	BAG1	binding	9	33242783	167	113	43	1	47\13\0	66\30\1	dom	0.550436	0.240789	1.25828	0.15697
rs107822	RING1	binding	6	33283553	167	96	49	12	40\15\5	56\34\7	dom	0.585838	0.277127	1.23844	0.161505
rs3744741	GEMIN4	processing	17	595982	167	120	33	4	51\8\1	69\25\3	dom	0.517543	0.205074	1.30611	0.163153
rs739837	VDR	binding	12	46524488	167	46	73	38	20\25\15	26\48\23	dom	0.560794	0.248272	1.26672	0.164144
rs197383	DDX20	processing	1	112094555	167	121	35	1	42\18\0	79\17\1	dom	1.83804	0.779722	4.33282	0.164147
rs17408716	RNASEN	processing	5	31503709	167	122	35	0	50\10\0	72\25\0	dom	0.513083	0.199425	1.32007	0.166346
rs10805564	RNASEN	processing	5	31427528	167	49	85	23	16\33\11	33\52\12	dom	1.76385	0.789341	3.94148	0.166562
rs7958377	E2F7	binding	12	75940098	167	121	32	4	44\13\3	77\19\1	dom	1.86928	0.769888	4.53857	0.166923
rs4867329	RNASEN	processing	5	31471384	167	47	73	37	15\30\15	32\43\22	dom	1.78124	0.785031	4.04162	0.167281
rs2073778	DGCR8	processing	22	18454575	167	119	36	2	48\11\1	71\25\1	dom	0.544834	0.22615	1.3126	0.175851
rs720012	DGCR8	processing	22	18478582	167	119	36	2	48\11\1	71\25\1	dom	0.544834	0.22615	1.3126	0.175851
rs6838203	FGF5	binding	4	81428016	167	87	59	11	34\20\6	53\39\5	rec	2.86722	0.623166	13.1923	0.176171
rs85276	DDX20	processing	1	112110854	167	120	35	2	42\18\0	78\17\2	dom	1.79812	0.764886	4.2271	0.178502
rs1042992	BNIP3L	binding	8	26325108	167	106	45	6	44\15\1	62\30\5	dom	0.579318	0.261197	1.28489	0.179209
rs11584005	EIF2C1	binding	1	36120161	167	146	11	0	53\7\0	93\4\0	dom	2.71486	0.62941	11.7101	0.180512
rs8946	BAG3	binding	10	121427002	166	60	73	24	19\30\11	41\43\13	dom	1.66706	0.783493	3.54705	0.184638
rs17147016	UGT2A3	binding	4	69829815	167	103	49	5	42\15\3	61\34\2	dom	0.585043	0.264704	1.29305	0.185231
rs17024661	GSTM5	binding	1	110059887	166	143	14	0	57\3\0	86\11\0	dom	0.379551	0.0900589	1.59961	0.18686
rs17600346	TNFSF10	binding	3	173706676	167	138	18	1	50\10\0	88\8\1	dom	2.14263	0.679907	6.75217	0.193191
rs3790611	WNT2B	binding	1	112869315	167	78	68	11	31\24\5	47\44\6	rec	2.68612	0.596592	12.0941	0.19805
rs3747240	SMC1L2	binding	22	44118888	167	135	21	1	50\9\1	85\12\0	dom	1.98477	0.696637	5.65473	0.199403
rs6886834	RNASEN	processing	5	31487206	167	98	50	9	41\15\4	57\35\5	dom	0.606804	0.280193	1.31414	0.205132
rs1051424	RPS6KB1	binding	17	55379106	167	112	42	3	45\13\2	67\29\1	dom	0.591965	0.26237	1.3356	0.206618
rs4734684	ATP6V1C1	binding	8	104151587	167	86	63	8	36\22\2	50\41\6	add	0.664665	0.350643	1.25991	0.210615
rs9980	NQO1	binding	16	68294969	167	116	35	6	47\12\1	69\23\5	dom	0.585996	0.251971	1.36282	0.214568
rs1558496	DGCR8	processing	22	18451737	167	85	61	11	36\21\3	49\40\8	dom	0.617752	0.287973	1.32519	0.216112
rs669702	RNASEN	processing	5	31427163	167	125	29	3	45\13\2	80\16\1	dom	1.77123	0.713576	4.39653	0.217785
rs11821102	CD44	binding	11	35209120	167	143	14	0	53\7\0	90\7\0	dom	2.18483	0.629634	7.58134	0.218254
rs3805500	RNASEN	processing	5	31498734	164	73	64	17	27\23\7	46\41\10	rec	2.11178	0.638824	6.98099	0.220432
rs12881840	DICER1	processing	14	94637756	167	150	6	1	56\4\0	94\2\1	dom	2.91302	0.52473	16.1715	0.221489
rs7572	CD34	binding	1	206126632	167	95	56	6	34\23\3	61\33\3	dom	1.60921	0.749453	3.45526	0.222381
rs7909303	NODAL	binding	10	71865850	167	89	57	11	36\22\2	53\35\9	rec	0.359215	0.0679619	1.89864	0.228114
rs2740349	GEMIN4	processing	17	595248	167	107	45	5	43\15\2	64\30\3	dom	0.614045	0.277594	1.35828	0.228599
rs1126772	SPP1	binding	4	89123210	167	103	49	5	34\25\1	69\24\4	dom	1.57816	0.749911	3.32117	0.22942
rs4842194	RXRA	binding	9	136470381	167	67	76	14	27\28\5	40\48\9	add	0.706503	0.397222	1.2566	0.236993
rs7735863	RNASEN	processing	5	31522297	167	131	24	2	49\11\0	82\13\2	dom	1.7697	0.672107	4.65975	0.247855
rs1476215	FGF2	binding	4	124037721	167	143	13	1	53\6\1	90\7\0	dom	2.03177	0.606497	6.80647	0.250442
rs1057035	DICER1	processing	14	94623895	167	71	66	20	27\28\5	44\38\15	rec	0.51451	0.164018	1.61398	0.254586
rs563002	DDX20	processing	1	112118658	167	104	48	5	43\17\0	61\31\5	dom	0.620937	0.273439	1.41005	0.254795
rs10931936	CASP8	binding	2	201852173	167	79	60	18	26\26\8	53\34\10	add	1.35895	0.801296	2.30469	0.255113
rs4016	PGRMC2	binding	4	129409930	167	75	68	14	28\25\7	47\43\7	add	1.38925	0.788479	2.44776	0.255279
rs8587	COX4NB	binding	16	84370732	167	99	51	7	35\21\4	64\30\3	dom	1.55001	0.72721	3.30376	0.256371
rs9333555	POLH	binding	6	43689913	167	144	13	0	57\3\0	87\10\0	dom	0.418707	0.0912002	1.92231	0.262907
rs3742330	DICER1	processing	14	94623115	167	130	25	2	53\6\1	77\19\1	dom	0.548216	0.1906	1.57681	0.264802
rs2853523	MTR	binding	1	235128821	167	55	83	19	22\29\9	33\54\10	rec	1.8723	0.61827	5.66983	0.267253
rs11663629	MBD1	binding	18	46049627	167	124	31	2	50\9\1	74\22\1	dom	0.587405	0.229438	1.50387	0.267325
rs2741	GHRHR	binding	7	30982090	167	124	30	3	49\11\0	75\19\3	dom	0.601216	0.244079	1.48091	0.268622
rs7588	PLK1	binding	16	23588666	167	88	62	7	32\25\3	56\37\4	dom	1.50972	0.725897	3.1399	0.270229
rs2291778	GEMIN4	processing	17	600568	167	137	18	2	56\3\1	81\15\1	dom	0.488388	0.134522	1.77312	0.275996
rs11160231	DICER1	processing	14	94681050	167	103	43	11	35\19\6	68\24\5	add	1.39716	0.764641	2.55289	0.276848
rs3732360	NR1I2	binding	3	121019271	167	86	62	9	32\25\3	54\37\6	rec	0.367386	0.0577891	2.3356	0.288651
rs2071214	BIRC5	binding	17	73731186	167	144	13	0	57\3\0	87\10\0	dom	0.458889	0.108808	1.93533	0.288787
rs2073869	TSC1	binding	9	134753637	167	113	39	5	41\16\3	72\23\2	dom	1.51553	0.699744	3.28239	0.291676
rs3917328	IL1R1	binding	2	102160973	167	144	12	1	57\3\0	87\9\1	dom	0.462666	0.109206	1.96014	0.295412
rs17410035	RNASEN	processing	5	31576899	167	68	76	13	24\30\6	44\46\7	add	1.35307	0.767562	2.38522	0.29584
rs197377	DDX20	processing	1	112093167	167	103	50	4	37\22\1	66\28\3	dom	1.4856	0.696012	3.17092	0.306219
rs10900596	MDM4	binding	1	202789080	167	81	62	14	33\22\5	48\40\9	dom	0.672732	0.312848	1.44661	0.310211
rs1042927	RRM1	binding	11	4116505	167	137	18	2	55\5\0	82\13\2	dom	0.545898	0.169359	1.7596	0.310739
rs1042032	EPHX2	binding	8	27457991	166	87	58	12	37\21\2	50\37\10	rec	0.428264	0.0810016	2.26428	0.31824
rs1042064	EPHX2	binding	8	27458049	167	87	58	12	37\21\2	50\37\10	rec	0.428264	0.0810016	2.26428	0.31824
rs10913632	ANGPTL1	binding	1	177086176	167	128	28	1	51\9\0	77\19\1	dom	0.61591	0.236901	1.60128	0.320132
rs12900401	SMAD3	binding	15	65273644	167	138	19	0	51\9\0	87\10\0	dom	1.71702	0.576562	5.11334	0.331585
rs8065843	FLJ35220	binding	17	76024941	167	92	52	13	37\20\3	55\32\10	rec	0.47825	0.107702	2.12366	0.332156
rs8006416	DICER1	processing	14	94686815	167	131	24	2	53\6\1	78\18\1	dom	0.591005	0.200364	1.74326	0.340612
rs1052133	OGG1	binding	3	9773773	167	94	52	11	33\24\3	61\28\8	dom	1.42607	0.677064	3.00369	0.35038
rs2854464	ACVR1B	binding	12	50675158	167	83	65	9	30\26\4	53\39\5	dom	1.40518	0.683429	2.88917	0.354984
rs3088440	CDKN2A	binding	9	21958159	164	129	23	2	47\10\1	82\13\1	dom	1.61003	0.585588	4.42665	0.356046
rs11958935	RNASEN	processing	5	31546515	167	54	74	29	20\26\14	34\48\15	rec	1.52043	0.62079	3.72384	0.359256
rs10719	RNASEN	processing	5	31437204	167	98	53	6	35\23\2	63\30\4	dom	1.42492	0.666634	3.04574	0.360889
rs11641233	NQO1	binding	16	68292064	166	102	48	7	36\20\4	66\28\3	dom	1.40867	0.667822	2.97139	0.368239
rs6884823	RNASEN	processing	5	31526878	167	136	21	0	51\9\0	85\12\0	dom	1.59989	0.574666	4.45412	0.368358
rs10773831	RAN	processing	12	129929869	167	72	71	14	23\32\5	49\39\9	dom	1.38871	0.66865	2.88419	0.378535
rs12186785	RNASEN	processing	5	31446365	164	131	22	1	48\10\1	83\12\0	dom	1.55402	0.576902	4.1861	0.383236
rs3733336	FGF5	binding	4	81426987	167	64	76	17	28\26\6	36\50\11	dom	0.713159	0.331962	1.53209	0.386238
rs7210080	SSTR2	binding	17	68678697	167	91	54	12	34\21\5	57\33\7	dom	1.40725	0.645147	3.06963	0.390585
rs10274	RPS6KB2	binding	11	66959402	167	49	71	37	20\27\13	29\44\24	add	0.802696	0.484869	1.32885	0.392819
rs4905275	DICER1	processing	14	94612630	167	99	48	10	34\21\5	65\27\5	dom	1.39837	0.642315	3.04435	0.398259
rs3743342	SMAD3	binding	15	65272721	167	90	54	13	36\20\4	54\34\9	add	0.786611	0.450439	1.37368	0.398776
rs9606248	DGCR8	processing	22	18467539	167	94	57	6	39\20\1	55\37\5	dom	0.721047	0.33561	1.54915	0.401926
rs8139591	DGCR8	processing	22	18473317	167	94	57	6	39\20\1	55\37\5	dom	0.721047	0.33561	1.54915	0.401926
rs17259350	CA9	binding	9	35672585	167	125	30	2	50\10\0	75\20\2	dom	0.683915	0.277256	1.68703	0.40953
rs10779765	MTHFR	binding	1	11760598	167	86	57	14	33\20\7	53\37\7	rec	1.71733	0.467879	6.30338	0.415013
rs3917329	IL1R1	binding	2	102162295	167	138	19	0	55\5\0	83\14\0	dom	0.61895	0.192016	1.99514	0.421784
rs1048201	FGF2	binding	4	124033758	167	113	42	2	44\15\1	69\27\1	dom	0.722849	0.32688	1.59848	0.422813
rs2453994	ATP6V1C1	binding	8	104152827	167	83	57	17	29\24\7	54\33\10	dom	1.3476	0.642724	2.8255	0.429674
rs12855	CDKN2C	binding	1	51212681	167	130	26	1	48\12\0	82\14\1	dom	1.47501	0.55778	3.90056	0.433424
rs13183642	RNASEN	processing	5	31546863	167	89	57	11	31\26\3	58\31\8	rec	0.547366	0.117758	2.54429	0.442053
rs3276	IGFBP5	binding	2	217245243	167	145	12	0	57\3\0	88\9\0	dom	0.572751	0.132694	2.47219	0.455115
rs10149095	DICER1	processing	14	94663960	167	104	39	14	39\15\6	65\24\8	add	1.25377	0.686765	2.28891	0.461481
rs12889916	SSTR1	binding	14	37749831	167	89	58	10	34\21\5	55\37\5	dom	1.33241	0.616922	2.87769	0.465085
rs1043180	NEIL2	binding	8	11682230	167	113	43	1	45\15\0	68\28\1	dom	0.737086	0.324537	1.67406	0.466086
rs3194726	ATP5L	binding	11	117785146	167	131	25	1	48\12\0	83\13\1	dom	1.43806	0.539919	3.83026	0.467316
rs1127687	CASP7	binding	10	115480099	166	88	57	11	34\19\6	54\38\5	rec	1.6664	0.412691	6.72879	0.473305
rs2279575	E2F7	binding	12	75941475	167	51	80	26	18\32\10	33\48\16	dom	0.741369	0.325713	1.68746	0.475768
rs417309	DGCR8	processing	22	18478544	166	130	26	0	53\7\0	77\19\0	dom	0.687856	0.244769	1.93303	0.477853
rs2287584	RNASEN	processing	5	31458764	167	100	50	7	36\22\2	64\28\5	dom	1.31611	0.615172	2.81569	0.479026
rs12125947	CDC7	binding	1	91763075	167	46	81	30	16\34\10	30\47\20	dom	1.3597	0.576711	3.20572	0.482583
rs3805502	RNASEN	processing	5	31497777	167	93	56	8	33\25\2	60\31\6	rec	0.531563	0.0906031	3.11865	0.483916
rs1187652	DICER1	processing	14	94624958	167	143	14	0	53\7\0	90\7\0	dom	1.54793	0.444649	5.38869	0.492393
rs10278782	CAV2	binding	7	115934637	167	96	56	5	34\25\1	62\31\4	dom	1.2892	0.609714	2.72594	0.506109
rs1047635	GPX7	binding	1	52847120	166	46	79	32	15\32\13	31\47\19	dom	1.31611	0.58344	2.96887	0.508101
rs10472999	UGT3A2	binding	5	36103778	167	72	70	15	30\24\6	42\46\9	dom	0.785161	0.382264	1.6127	0.51015
rs872396	RAN	processing	12	129913765	167	124	31	2	46\14\0	78\17\2	dom	1.32405	0.551972	3.17611	0.52949
rs352222	FZD3	binding	8	28477700	167	55	69	33	20\26\14	35\43\19	rec	1.32683	0.548242	3.21113	0.530584
rs11655950	IGF2BP1	binding	17	44484120	167	73	73	11	27\30\3	46\43\8	rec	0.621333	0.138851	2.78035	0.533644
rs17784006	DICER1	processing	14	94631361	167	138	16	3	51\8\1	87\8\2	dom	1.39626	0.476168	4.09423	0.543091
rs174546	FEN1	binding	11	61326406	167	77	62	18	28\23\9	49\39\9	rec	1.39469	0.459536	4.23289	0.557001
rs443039	RICTOR	binding	5	38976615	167	153	4	0	58\2\0	95\2\0	dom	1.89245	0.224602	15.9453	0.557477
rs7245	NDUFA6	binding	22	40811795	167	47	76	34	18\31\11	29\45\23	rec	0.769763	0.319646	1.85372	0.559519
rs595055	EIF2C1	binding	1	36152720	167	121	34	2	49\11\0	72\23\2	dom	0.765297	0.309946	1.88961	0.56189
rs17287964	XPO5	processing	6	43634715	167	127	29	1	47\12\1	80\17\0	dom	1.30174	0.532294	3.18342	0.563295
rs11076	SETD1A	binding	16	30903029	167	55	75	27	19\32\9	36\43\18	rec	0.746976	0.276287	2.01954	0.565377
rs5005121	RRM2B	binding	8	103288260	167	139	16	2	52\7\1	87\9\1	dom	1.36977	0.462804	4.05412	0.569815
rs10848238	RAN	processing	12	129928763	167	110	37	10	44\12\4	66\25\6	dom	0.801032	0.362548	1.76984	0.583343
rs673019	RNASEN	processing	5	31464370	167	124	32	1	49\10\1	75\22\0	dom	0.78857	0.318275	1.95379	0.607865
rs1133043	GPR30	binding	7	1099831	167	67	75	15	27\26\7	40\49\8	rec	1.365	0.414975	4.48997	0.608524
rs1133026	HSPB8	binding	12	118116730	167	92	56	9	34\21\5	58\35\4	dom	1.20737	0.586251	2.48655	0.609183
rs11624081	DICER1	processing	14	94651714	167	122	32	3	47\13\0	75\19\3	dom	0.798546	0.33169	1.9225	0.615774
rs6537355	SMAD1	binding	4	146622042	167	123	31	3	46\11\3	77\20\0	dom	1.24406	0.528587	2.92799	0.617026
rs1187642	DICER1	processing	14	94615340	167	74	61	22	27\23\10	47\38\12	rec	1.31234	0.450206	3.82546	0.618515
rs502267	RNASEN	processing	5	31427481	167	99	53	5	36\22\2	63\31\3	dom	1.21429	0.56138	2.62658	0.621835
rs1050244	DDB2	binding	11	47217053	166	144	12	0	55\5\0	89\7\0	dom	0.72071	0.189908	2.73513	0.630295
rs854552	PON1	binding	7	94765860	167	92	56	9	36\21\3	56\35\6	rec	1.48227	0.281568	7.80317	0.642343
rs2075912	RET	binding	10	42942223	167	111	44	2	41\17\2	70\27\0	dom	1.19657	0.551953	2.59401	0.649414
rs12507078	ADH6	binding	4	100344891	167	124	32	1	47\12\1	77\20\0	dom	1.22046	0.516386	2.88449	0.649849
rs1045261	CD4	binding	12	6799898	166	127	29	1	49\11\0	78\18\1	dom	0.807294	0.319587	2.03927	0.650714
rs138056	SULT4A1	binding	22	42552006	167	101	50	6	37\21\2	64\29\4	dom	1.19632	0.550005	2.60211	0.651195
rs2075993	E2F2	binding	1	23708951	167	39	83	35	15\32\13	24\51\22	rec	0.816886	0.330537	2.01884	0.661291
rs6504593	IGF2BP1	binding	17	44487818	167	45	74	38	19\28\13	26\46\25	rec	0.827884	0.3514	1.95046	0.66574
rs3747238	SMC1L2	binding	22	44118760	167	53	73	31	19\29\12	34\44\19	rec	1.22551	0.484936	3.09703	0.667262
rs1167829	PMS2L3	binding	7	75002954	167	90	61	6	34\24\2	56\37\4	dom	0.854974	0.408977	1.78734	0.67708
rs1061280	SMO	binding	7	128640359	167	117	36	4	44\14\2	73\22\2	dom	1.19595	0.513008	2.78808	0.678604
rs1061285	SMO	binding	7	128640544	167	117	36	4	44\14\2	73\22\2	dom	1.19595	0.513008	2.78808	0.678604
rs2302905	RNASEN	processing	5	31441738	167	109	47	1	40\20\0	69\27\1	dom	1.18104	0.535999	2.60235	0.679745
rs7576	GHITM	binding	10	85902586	167	114	40	3	45\14\1	69\26\2	dom	0.84127	0.364145	1.94355	0.685798
rs4988514	SST	binding	3	188869525	167	132	21	4	50\8\2	82\13\2	dom	1.22596	0.456894	3.28954	0.685818
rs573971	MLL	binding	11	117898606	167	107	46	4	40\18\2	67\28\2	dom	1.1739	0.539621	2.55371	0.685983
rs4796033	RAD51L3	binding	17	30457600	167	124	31	2	48\12\0	76\19\2	dom	0.827328	0.32862	2.08286	0.687403
rs639174	RNASEN	processing	5	31469404	167	93	57	7	34\23\3	59\34\4	dom	1.16004	0.550239	2.44565	0.696458
rs2286928	DGCR8	processing	22	18478521	167	143	14	0	55\5\0	88\9\0	dom	0.774965	0.215202	2.79074	0.696546
rs15561	NAT1	binding	8	18124931	167	81	64	12	31\24\5	50\40\7	rec	1.29249	0.350476	4.76645	0.699994
rs4986993	NAT1	binding	8	18125027	167	81	64	12	31\24\5	50\40\7	rec	1.29249	0.350476	4.76645	0.699994
rs10770125	IGF2AS	binding	11	2125590	167	36	75	46	15\28\17	21\47\29	dom	0.846016	0.360785	1.98385	0.700568
rs1062923	GEMIN4	processing	17	595817	167	113	39	5	42\15\3	71\24\2	dom	1.17813	0.510653	2.71807	0.700736
rs7015453	NEIL2	binding	8	11657395	167	108	46	3	42\16\2	66\30\1	dom	0.857093	0.386263	1.90183	0.704528
rs17452383	ARNTL	binding	11	13366947	167	119	35	3	47\13\0	72\22\3	dom	0.849353	0.358545	2.01203	0.710582
rs7154948	BAG5	binding	14	103092697	166	56	75	25	24\26\10	32\49\15	rec	1.20193	0.451928	3.19663	0.712466
rs1047920	SNAI1	binding	20	48038514	167	131	26	0	50\10\0	81\16\0	dom	0.846346	0.332653	2.1533	0.72623
rs1051685	XRCC5	binding	2	216778621	167	115	41	1	45\15\0	70\26\1	dom	0.864558	0.376382	1.98591	0.731596
rs7695605	TLR2	binding	4	154854886	167	93	59	5	36\24\0	57\35\5	dom	0.880916	0.422301	1.83758	0.735366
rs11263830	EIF2C1	binding	1	36118385	167	133	23	1	51\9\0	82\14\1	dom	1.18812	0.419648	3.36382	0.745466
rs12318549	RAN	processing	12	129931121	167	125	28	4	48\10\2	77\18\2	dom	0.862861	0.3508	2.12237	0.748053
rs5030740	RPA1	binding	17	1747350	167	102	44	11	38\17\5	64\27\6	rec	1.24516	0.306369	5.0606	0.759245
rs17695156	SP1	binding	12	52092922	167	133	23	1	51\8\1	82\15\0	dom	0.856997	0.318799	2.30378	0.759707
rs10787498	CASP7	binding	10	115479640	167	80	62	15	29\25\6	51\37\9	rec	1.20151	0.350647	4.117	0.77017
rs1131636	RPA1	binding	17	1747939	167	60	73	24	23\27\10	37\46\14	dom	0.896394	0.415583	1.93348	0.78034
rs16869269	RRM2B	binding	8	103288805	167	124	29	4	47\12\1	77\17\3	dom	1.12469	0.467047	2.70834	0.793275
rs16849151	FLJ38991	binding	4	74141413	167	115	37	5	42\16\2	73\21\3	dom	1.11267	0.498678	2.48263	0.794303
rs4246215	FEN1	binding	11	61320875	166	73	64	19	26\25\9	47\39\10	rec	1.15226	0.38667	3.43367	0.799193
rs3124591	NOTCH1	binding	9	138510218	165	35	85	36	12\34\13	23\51\23	rec	0.890119	0.358144	2.21227	0.802132
rs6413492	IGFBP2	binding	2	217237196	167	149	8	0	57\3\0	92\5\0	dom	1.20774	0.247068	5.9038	0.815657
rs1048691	CDK4	binding	12	56439215	167	105	46	6	40\18\2	65\28\4	dom	1.08927	0.493102	2.4062	0.832535
rs9532558	FOXO1A	binding	13	40031015	167	152	5	0	58\2\0	94\3\0	dom	1.25704	0.145727	10.8432	0.835169
rs17330637	BIRC4	binding	X	122871386	167	110	32	15	42\12\6	68\20\9	dom	0.921689	0.407954	2.08237	0.844533
rs7869402	TLR4	binding	9	119517853	167	150	7	0	57\3\0	93\4\0	dom	1.18404	0.200652	6.98703	0.852031
rs139999	TXN2	binding	22	35193321	167	127	28	2	50\9\1	77\19\1	dom	0.913043	0.350738	2.37684	0.852159
rs10035440	RNASEN	processing	5	31575220	167	101	53	3	38\21\1	63\32\2	dom	0.934865	0.436646	2.00156	0.862332
rs8078549	ERN1	binding	17	59560099	167	154	3	0	59\1\0	95\2\0	dom	0.793737	0.0537047	11.7311	0.866498
rs17749202	WNT11	binding	11	75575022	167	70	73	14	29\26\5	41\47\9	rec	0.890283	0.228766	3.46469	0.866876
rs2057606	EIF2C1	binding	1	36158411	167	154	3	0	59\1\0	95\2\0	dom	0.802204	0.0545611	11.7947	0.872332
rs1888087	ANGPT4	binding	20	801435	167	133	24	0	51\9\0	82\15\0	dom	1.08534	0.393388	2.9944	0.874334
rs4661	GPX3	binding	5	150388508	167	137	19	1	53\7\0	84\12\1	dom	0.915544	0.300779	2.78684	0.876535
rs6941583	POLH	binding	6	43690069	167	152	5	0	58\2\0	94\3\0	dom	0.856115	0.112253	6.52926	0.880867
rs12226697	SIRT3	binding	11	206056	167	143	14	0	54\6\0	89\8\0	dom	1.10451	0.297272	4.1038	0.881996
rs1425486	PDGFC	binding	4	157903135	167	68	68	21	26\25\9	42\43\12	dom	1.05858	0.499077	2.24533	0.882035
rs9473029	TNFRSF21	binding	6	47308102	167	144	13	0	54\6\0	90\7\0	dom	1.09651	0.303103	3.96672	0.88832
rs6058896	DNMT3B	binding	20	30859813	167	138	19	0	54\6\0	84\13\0	dom	1.07969	0.333898	3.49126	0.898113
rs7712155	RNASEN	processing	5	31479321	167	104	50	3	39\20\1	65\30\2	dom	1.0477	0.487069	2.25363	0.905088
rs4647342	CASP2	binding	7	142713454	167	136	20	1	51\8\1	85\12\0	dom	1.06699	0.366076	3.10989	0.90544
rs546782	FGF9	binding	13	21173946	167	117	36	4	45\13\2	72\23\2	dom	0.957399	0.418832	2.1885	0.917799
rs2273368	WNT2B	binding	1	112865294	167	111	39	7	43\13\4	68\26\3	dom	0.961979	0.434591	2.12936	0.923827
rs213210	RING1	binding	6	33283802	167	140	16	1	53\6\1	87\10\0	dom	1.05049	0.331049	3.33346	0.933365
rs446059	DGCR8	processing	22	18439763	167	141	16	0	54\6\0	87\10\0	dom	0.954179	0.285465	3.18938	0.939274
rs10518679	BMF	binding	15	38169733	167	113	39	5	44\15\1	69\24\4	dom	1.01815	0.443262	2.33865	0.966182
rs4690150	FGF5	binding	4	81430594	167	81	63	13	32\23\5	49\40\8	dom	0.985447	0.484479	2.00444	0.967721
rs617673	EIF2C1	binding	1	36167702	167	155	2	0	60\0\0	95\2\0	NA	NA	NA	NA	NA
rs7214055	EZH1	binding	17	38106697	167	156	1	0	60\0\0	96\1\0	NA	NA	NA	NA	NA
MOI, best model of inheritance; L95% and U95%, lowest and highest ORs, respectively, within 95% confidence interval
*# Adjusted for age, sex, clinical stage, performance status, smoking status, radiation therapy type, radiation treatment type and dose and lung function
